# Supplementary material for: Neuropsychiatric Disorders and Potentially Preventable Hospitalizations in a Prospective Cohort Study of Older Americans
Source: Springer Nature journal article supplement (doi:10.1007/s11606-014-2916-8), 2014-06-18
Supplement: MOESM2 [file 11606_2014_2916_MOESM2_ESM.docx]

**eTable 2. Fully adjusted competing-risks regression analyses of the association of neuropsychiatric disordersa at baseline and risk of hospitalization for an ambulatory-care sensitive condition**

|  | **Competing Risks** | | |
| --- | --- | --- | --- |
|  | **Hospitalization for non-ambulatory care-sensitive condition** | **Psychiatric hospitalization** | **Death** |
|  | **Sub-hazard Ratio (95% Confidence Interval)** | | |
| **Depression alone**  **CIND alone**  **Dementia alone**  **Comorbid depression and CIND**  **Comorbid depression and dementia** | **1.30 (1.14, 1.47)ǂ**  **1.17 (1.03, 1.32)***  **1.12 (0.95, 1.32)**  **1.38 (1.17, 1.63)ǂ**  **1.44 (1.19, 1.75)ǂ** | **1.36 (1.20, 1.55)ǂ**  **1.26 (1.11, 1.42)ǂ**  **1.34 (1.13, 1.58)†**  **1.45 (1.23, 1.71)ǂ**  **1.56 (1.28, 1.90)ǂ** | **1.33 (1.17, 1.51)ǂ**  **1.28 (1.13, 1.44)ǂ**  **1.16 (0.97, 1.37)**  **1.52 (1.29, 1.79)ǂ**  **1.40 (1.15, 1.71)†** |
| Age  Female  Non-white  < High school graduate  Single/separated/widowed  Net worth < $125,000b  Charlson score ≥ 1  ≥ 1 hospitalization in the previous year  Alcohol consumption  1 drink/day  2 drinks/day  3 drinks/day  ≥ 4 drinks/day  Smoking  Former smoker  Current smoker  Substance abuse diagnosis  Obesity | 1.03 (1.03, 1.04)**ǂ**  0.99 (0.90, 1.09)  1.02 (0.91, 1.16)  1.16 (1.06, 1.28)†  1.07 (0.97, 1.18)  1.38 (1.25, 1.53)**ǂ**  1.76 (1.57, 1.98)**ǂ**  1.22 (1.09, 1.38)†  0.82 (0.72, 0.94)†  0.78 (0.65, 0.94)*  1.08 (0.79, 1,47)  0.98 (0.70, 1.35)  1.27 (1.16, 1.40)**ǂ**  1.45 (1.26, 1.68)**ǂ**  1.12 (0.78, 1.62)  1.38 (1.01, 1.90)* | 1.05 (1.04, 1.06)ǂ  0.88 (0.80, 0.96)†  1.04 (0.92, 1.17)  1.10 (1.00, 1.21)*  1.07 (0.97, 1.18)  1.46 (1.32, 1.61)ǂ  2.32 (2.07, 2.60)ǂ  1.30 (1.16, 1.47)ǂ  0.80 (0.70, 0.92)†  0.72 (0.60, 0.87)†  1.28 (0.95, 1,73)  1.02 (0.74, 1.40)  1.26 (1.15, 1.39)ǂ  1.51 (1.31, 1.74)ǂ  1.40 (1.00, 1.96)  1.35 (0.98, 1.86) | 1.04 (1.03, 1.04)ǂ  0.93 (0.84, 1.02)  1.06 (0.94, 1.19)  1.11 (1.01, 1.21)*  1.05 (0.95, 1.16)  1.41 (1.28, 1.55)ǂ  2.12 (1.89, 2.39)ǂ  1.28 (1.13, 1.44)ǂ  0.83 (0.72, 0.95)†  0.75 (0.62, 0.90)†  1.29 (0.97, 1.73)  1.05 (0.77, 1.44)  1.26 (1.15, 1.39)ǂ  1.45 (1.26, 1.67)ǂ  1.15 (0.78, 1.69)  1.33 (0.98, 1.82) |

Abbreviation: CIND = cognitive impairment without dementia.

* *P* < 0.05

† *P* < 0.01

ǂ *P* < 0.001

a The comparison group for analyses of the association of neuropsychiatric disorders with risk of hospitalization for an ambulatory care-sensitive condition is those subjects with no disorder.

b The median household net worth is $125,200.
